# Supplementary material for: Quadruple-well ferroelectricity and moderate switching barrier in defective wurtzite α-Al2S3: a first-principles study
Source: Research Square preprint supplement (doi:10.21203/rs.3.rs-4680101/v1), 2024-08-23
Supplement: Supplementary file 1 [file 737da2b7b66979207606c462.pdf]

**Supporting Information: Quadruple-well  
ferroelectricity and moderate switching barrier  
in defective wurtzite  $\alpha$ -Al<sub>2</sub>S<sub>3</sub>:  
a first-principles study**

*Yuto Shimomura<sup>1</sup>, Saneyuki Ohno<sup>1,2</sup>, Katsuro Hayashi<sup>1</sup>, Hirofumi Akamatsu<sup>1\*</sup>*

<sup>1</sup>Department of Applied Chemistry, Graduate School of Engineering, Kyushu University, 744  
Motoooka, Nishi-ku, Fukuoka 819-0395, Japan.

<sup>2</sup>Institute of Multidisciplinary Research for Advanced Materials, Tohoku University, 2-1-1  
Katahira, Aoba-ku, Sendai, Miyagi 980-8577, Japan.

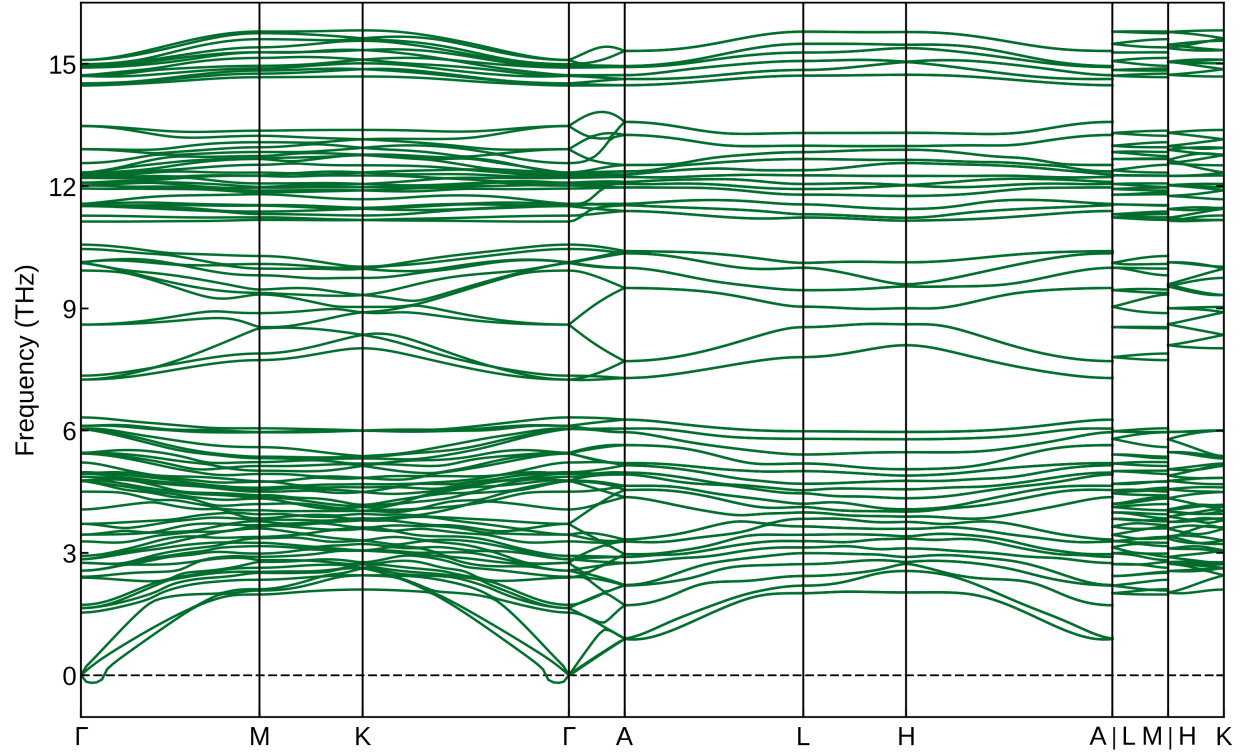

**Figure S1.** Phonon band structure of  $\alpha\text{-Al}_2\text{S}_3$  in the +HP states. The unstable branches near  $\Gamma$  point are considered to be interpolation artefacts since the size of supercell does not commensurate the wavevectors.

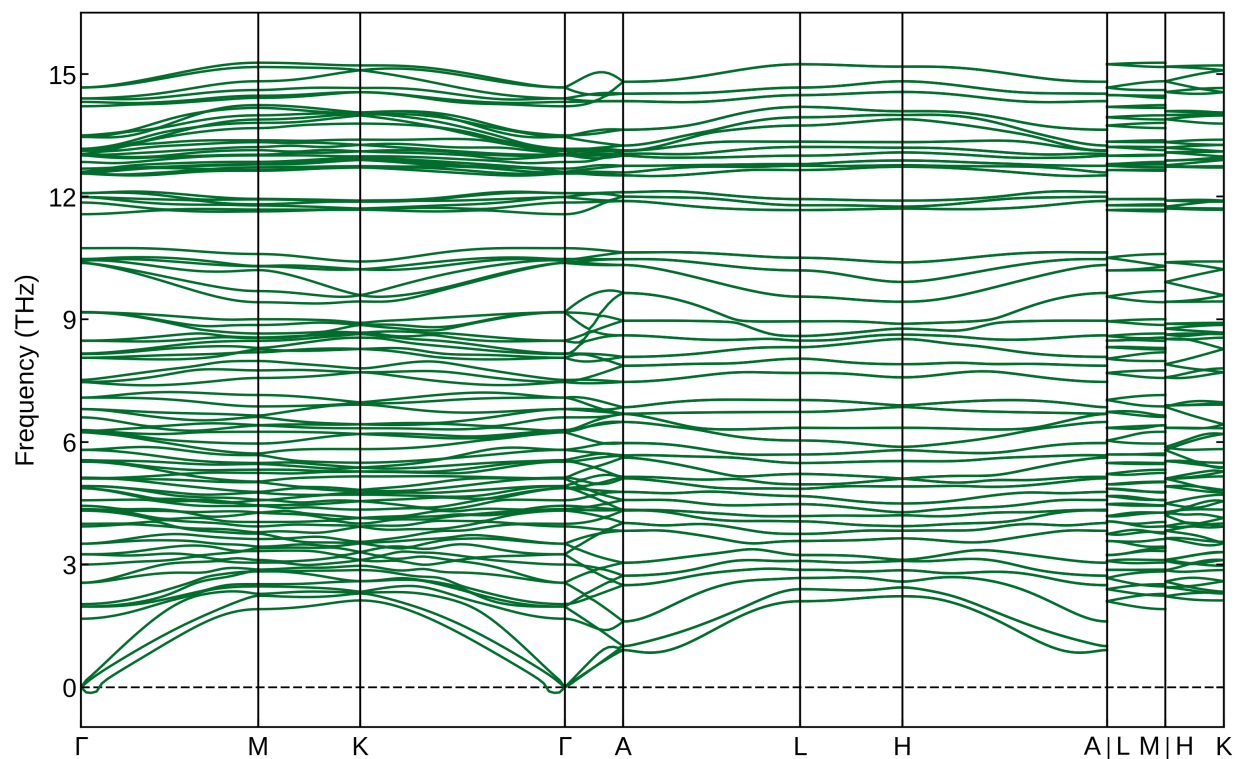

**Figure S2.** Phonon band structure of  $\alpha\text{-Al}_2\text{S}_3$  in the +LP states. The unstable branches near  $\Gamma$  point are considered to be interpolation artefacts since the size of supercell does not commensurate the wavevectors.

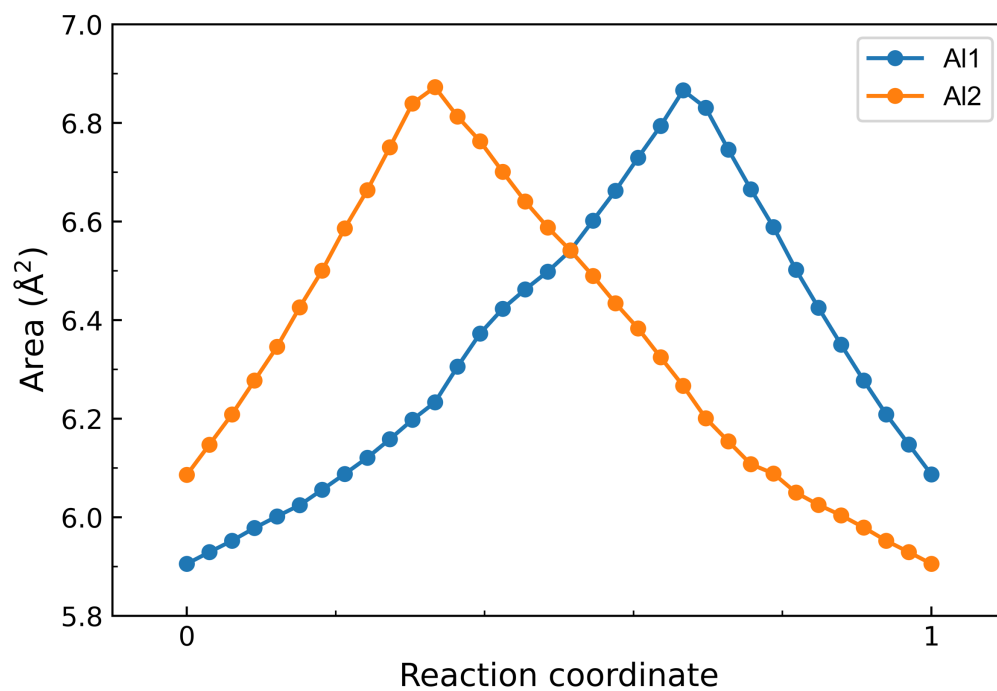

**Figure S3.** Change in the area of the basal triangles involved with the Al1 and Al2 atoms.

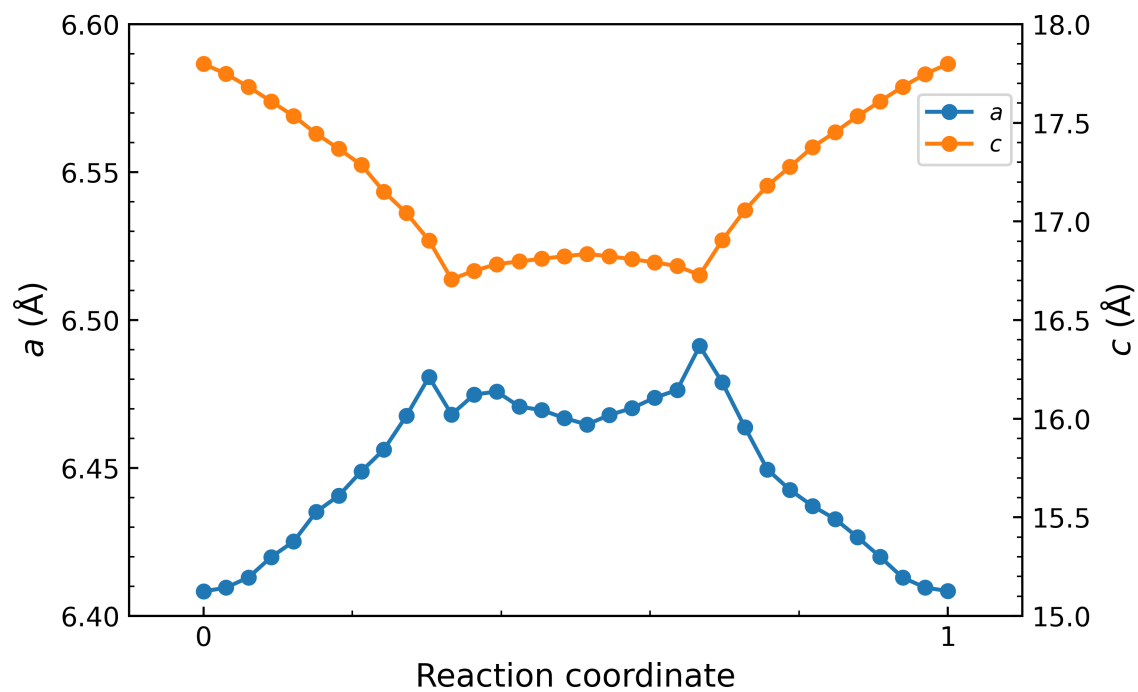

**Figure S4.** Variation of the lattice constants  $a$  and  $c$  during the polarization switching of  $\alpha\text{-Al}_2\text{S}_3$ .

## Supplementary Video

An mp4 file ("Al<sub>2</sub>S<sub>3</sub>\_switching.mp4") is given as a supplementary movie. This movie shows an animation associated with polarization switching in  $\alpha$ -Al<sub>2</sub>S<sub>3</sub>. The light blue and yellow spheres indicate Al and S atoms, respectively.
